# Supplementary material for: Identification and Characterization of Two Regiospecific Tricetin UDP-Dependent Glycosyltransferases from Pomegranate (Punica granatum L.)
Source: MDPI journal article supplement (doi:10.3390/plants11060810), 2022-03-18
Supplement: s1 [file s1]

**Table S1.** High-resolution electrospray ionization mass spectrometry (HR-ESI-MS) data of metabolites extracted from pomegranate anthers. Rt, retention time.

| Peak | R <sub>t</sub> (min) | [M+NH <sub>4</sub> ] <sup>+</sup> /[M+H] <sup>+</sup> /[M-H] <sup>-</sup><br>( <i>m/z</i> ) | MS/MS ( <i>m/z</i> )                                                                                                      | Calculated formula                                                            | Tentative identification                                                                                                  |
|------|----------------------|---------------------------------------------------------------------------------------------|---------------------------------------------------------------------------------------------------------------------------|-------------------------------------------------------------------------------|---------------------------------------------------------------------------------------------------------------------------|
| 1    | 0.98                 | -/-/154.0621                                                                                | -/-/93.0457, 110.0722, 137.0356                                                                                           | C <sub>6</sub> H <sub>9</sub> N <sub>3</sub> O <sub>2</sub>                   | L-histidine                                                                                                               |
| 2    | 1.00                 | -/-/146.0495                                                                                | -/-/102.0560, 128.0353                                                                                                    | C <sub>5</sub> H <sub>10</sub> N <sub>2</sub> O <sub>3</sub>                  | Glutamine                                                                                                                 |
| 3    | 1.03                 | -/-/165.0402                                                                                | -/-/75.0086, 129.0192                                                                                                     | C <sub>6</sub> H <sub>6</sub> N <sub>4</sub> O <sub>2</sub>                   | 7-Methylxanthine                                                                                                          |
| 4    | 1.04                 | -/-/135.0371                                                                                | -/-/75.0087, 89.0244                                                                                                      | C <sub>4</sub> H <sub>4</sub> O <sub>5</sub>                                  | L-Threonic acid                                                                                                           |
| 5    | 1.04                 | -/-/341.1091                                                                                | -/-/59.0138, 71.0137, 89.0243, 101.0243, 119.0347, 179.0560, 341.1091                                                     | C <sub>12</sub> H <sub>22</sub> O <sub>11</sub>                               | Trehalose                                                                                                                 |
| 6    | 1.04                 | -/-/377.0854                                                                                | -/-/341.1091                                                                                                              | C <sub>18</sub> H <sub>18</sub> O <sub>9</sub>                                | Unknown                                                                                                                   |
| 7    | 1.12                 | -/-/300.0489                                                                                | -/-/78.9589, 96.9694                                                                                                      | C <sub>8</sub> H <sub>16</sub> NO <sub>9</sub> P                              | N-Acetyl- $\alpha$ -D-glucosamine 1-phosphate                                                                             |
| 8    | 1.12                 | -/-/179.0559                                                                                | -/-/59.0137, 75.0086, 143.0384, 161.0454                                                                                  | C <sub>6</sub> H <sub>12</sub> O <sub>6</sub>                                 | D-(-)-Fructose                                                                                                            |
| 9    | 1.12, 1.37           | -<br>/136.02/134.014<br>2                                                                   | -/91.05, 119.05, 136.02/71.0138, 89.0243, 115.0036, 133.0142                                                              | C <sub>4</sub> H <sub>6</sub> O <sub>5</sub>                                  | Malic acid                                                                                                                |
| 10   | 1.14                 | -/-/149.0453                                                                                | -/-/59.0138, 75.0086, 131.0348                                                                                            | C <sub>5</sub> H <sub>10</sub> O <sub>5</sub>                                 | D-(-)-Arabinose                                                                                                           |
| 11   | 1.15                 | -/-/259.0294                                                                                | -/-/78.9589, 96.9692, 138.9702, 198.9908                                                                                  | C <sub>6</sub> H <sub>13</sub> O <sub>9</sub> P                               | D-Glucose 6-phosphate                                                                                                     |
| 12   | 1.18                 | -/-/439.0858                                                                                | -/-/78.9589, 96.9694                                                                                                      | C <sub>19</sub> H <sub>20</sub> O <sub>12</sub>                               | Unknown                                                                                                                   |
| 13   | 1.38                 | -/-/323.0283                                                                                | -/-/78.9590, 96.9694, 111.0200                                                                                            | C <sub>9</sub> H <sub>13</sub> N <sub>2</sub> O <sub>9</sub> P                | Uridine monophosphate (UMP)                                                                                               |
| 14   | 1.43                 | -/-/188.0564                                                                                | -/-/98.0246, 114.0559, 142.0508, 144.0665                                                                                 | C <sub>7</sub> H <sub>11</sub> NO <sub>5</sub>                                | N-Acetyl-DL-glutamic acid                                                                                                 |
| 15   | 1.54                 | -/-/128.0352                                                                                | -/-/128.0352                                                                                                              | C <sub>5</sub> H <sub>7</sub> NO <sub>3</sub>                                 | 4-oxoproline                                                                                                              |
| 16   | 1.55                 | -/-/191.0197                                                                                | -/-/85.0294, 87.0086, 111.0086, 129.0193                                                                                  | C <sub>6</sub> H <sub>8</sub> O <sub>7</sub>                                  | D-(-)-Quinic acid; Citric acid                                                                                            |
| 17   | 1.60                 | -/-/611.1443                                                                                | -/-/128.0351, 143.0461, 306.0767                                                                                          | C <sub>20</sub> H <sub>32</sub> N <sub>6</sub> O <sub>12</sub> S <sub>2</sub> | L-Glutathione oxidized                                                                                                    |
| 18   | 1.88                 | 350.0997/-<br>/331.0672                                                                     | 109.0287, 127.0389, 145.0495, 153.0179, 171.0285, 315.0710, /-/125.0242, 151.0035, 169.0141, 211.0247, 241.0357, 271.0451 | C <sub>13</sub> H <sub>16</sub> O <sub>10</sub>                               | Galloyl glucoside                                                                                                         |
| 19   | 2.25, 7.70, 8.75     | 652.1132/-<br>/633.0740                                                                     | 259.0233, 277.0338, 303.0129, 447.0553/-/125.0241, 169.0141, 231.0295, 249.0403, 275.0198, 300.9989                       | C <sub>27</sub> H <sub>22</sub> O <sub>18</sub>                               | 6-O-galloyl-2, 3-(S)-hexahydroxydiphenoyl -D-glucose; Corilagin; Isocorilagin; Hippomanin A; Gemin D; Strictinin (galloyl |

|    |                           |                             |                                                                                                                                   |                                                               |                                                                                                                                     |
|----|---------------------------|-----------------------------|-----------------------------------------------------------------------------------------------------------------------------------|---------------------------------------------------------------|-------------------------------------------------------------------------------------------------------------------------------------|
|    |                           |                             |                                                                                                                                   |                                                               | HHDP glucoside)                                                                                                                     |
| 20 | 2.27                      | -<br>/171.0288/169.0<br>141 | -/81.0341, 107.0130, 109.0286,<br>125.0233, 127.0389,<br>153.0180/125.0242                                                        | C <sub>7</sub> H <sub>6</sub> O <sub>5</sub>                  | Gallic acid                                                                                                                         |
| 21 | 2.29                      | -/-/153.0192                | -/-/83.0138, 151.0036                                                                                                             | C <sub>7</sub> H <sub>6</sub> O <sub>4</sub>                  | 2,4-Dihydroxybenzoic acid                                                                                                           |
| 22 | 2.42, 4.45,<br>5.89, 7.12 | 502.1180/-<br>/483.0782     | 127.0390, 153.0180, 171.0285,<br>297.0598, 315.0703/-/125.0243,<br>169.0141, 313.0565, 331.0675                                   | C <sub>20</sub> H <sub>20</sub> O <sub>14</sub>               | (Digalloyl glucoside)<br>Gallic acid 3- <i>O</i> -β-D-(6'- <i>O</i> -<br>galloyl)-glucopyranoside                                   |
| 23 | 2.54                      | -<br>/345.0812/343.0<br>669 | -/153.0180/191.0561                                                                                                               | C <sub>14</sub> H <sub>16</sub> O <sub>10</sub>               | Unknown                                                                                                                             |
| 24 | 3.04                      | -/-/295.1035                | -/-/59.0138, 71.0137, 89.0243,<br>101.0244, 119.0349                                                                              | C <sub>11</sub> H <sub>20</sub> O <sub>9</sub>                | Unknown                                                                                                                             |
| 25 | 4.37                      | -/467.0816/-                | -/153.0180/-                                                                                                                      | C <sub>20</sub> H <sub>18</sub> O <sub>13</sub>               | Unknown                                                                                                                             |
| 26 | 4.44                      | -/-/218.1033                | -/-/88.0403, 146.0822                                                                                                             | C <sub>9</sub> H <sub>17</sub> NO <sub>5</sub>                | Pantothenic acid                                                                                                                    |
| 27 | 4.65                      | -/-/325.0565                | -/-/93.0343, 125.0242, 169.0141                                                                                                   | C <sub>14</sub> H <sub>14</sub> O <sub>9</sub>                | Unknown                                                                                                                             |
| 28 | 4.79                      | -/-/487.1098                | -/-/125.0242, 169.0141,<br>211.0249, 331.0672, 469.0991                                                                           | C <sub>20</sub> H <sub>24</sub> O <sub>14</sub>               | Galloyl-hexoside derivative                                                                                                         |
| 29 | 5.36                      | -/-/309.1193                | -/-/59.0137, 89.0243, 101.0244,<br>119.0349                                                                                       | C <sub>12</sub> H <sub>22</sub> O <sub>9</sub>                | Unknown                                                                                                                             |
| 30 | 6.08                      | -/-/203.0828                | -/-/74.0247, 116.0505,<br>142.0662, 159.0928                                                                                      | C <sub>11</sub> H <sub>12</sub> N <sub>2</sub> O <sub>2</sub> | D-(+)-tryptophan                                                                                                                    |
| 31 | 6.26                      | -<br>/469.1339/467.1<br>198 | -/139.0388/125.0243, 137.0247,<br>167.0349, 179.0347, 219.0655,<br>305.0666                                                       | C <sub>21</sub> H <sub>24</sub> O <sub>12</sub>               | Unknown                                                                                                                             |
| 32 | 6.65                      | -/595.1439/-                | -/271.0595, 433.1123/-                                                                                                            | C <sub>27</sub> H <sub>31</sub> O <sub>15</sub> <sup>+</sup>  | Cyanidin-3- <i>O</i> -rutinoside                                                                                                    |
| 33 | 6.67                      | -<br>/497.0923/495.0<br>784 | -/153.0180, 305.0285/191.0561,<br>343.0669                                                                                        | C <sub>21</sub> H <sub>20</sub> O <sub>14</sub>               | Unknown                                                                                                                             |
| 34 | 6.74                      | -/-/611.1619                | -/-/93.0345, 149.0244,<br>165.0190, 193.0140, 269.0453,<br>287.0557, 355.0678, 449.1100                                           | C <sub>27</sub> H <sub>31</sub> O <sub>16</sub> <sup>+</sup>  | Cyanidin-3,5-di- <i>O</i> -glucoside                                                                                                |
| 35 | 6.80                      | -/-/401.1089                | -/-/134.0372, 149.0607,<br>178.0270, 193.0505, 355.1036                                                                           | C <sub>17</sub> H <sub>22</sub> O <sub>11</sub>               | Unknown                                                                                                                             |
| 36 | 6.81                      | -/-/355.1035                | -/-/134.0372, 149.0606,<br>178.0270, 193.0505                                                                                     | C <sub>16</sub> H <sub>20</sub> O <sub>9</sub>                | Unknown                                                                                                                             |
| 37 | 7.00                      | -<br>/185.0442/183.0<br>296 | -/126.0311, 153.0180,<br>171.0285/124.0164, 168.0063                                                                              | C <sub>8</sub> H <sub>8</sub> O <sub>5</sub>                  | Unknown                                                                                                                             |
| 38 | 7.24, 8.47                | 804.1237/-<br>/785.0843     | 153.0181, 259.0233, 277.0338,<br>303.0131, 467.0816, 617.0771,<br>787.1013/-/125.0244, 169.0141,<br>231.0297, 249.0404, 275.0198, | C <sub>34</sub> H <sub>26</sub> O <sub>22</sub>               | (Digalloyl HHDP glucoside)<br>1,2-di- <i>O</i> -galloyl-4,6- <i>O</i> -( <i>S</i> )-<br>hexahydroxydiphenylβ-D-<br>glucopyranoside; |

|    |                              |                     |                                                                                              |                                                 |                                                                                                                                                                                                                                                                                       |
|----|------------------------------|---------------------|----------------------------------------------------------------------------------------------|-------------------------------------------------|---------------------------------------------------------------------------------------------------------------------------------------------------------------------------------------------------------------------------------------------------------------------------------------|
|    |                              |                     | 300.9989                                                                                     |                                                 | Tercatin/1,4-di- <i>O</i> -galloyl-3,6-( <i>R</i> )-hexahydroxydiphenyl- $\beta$ -glucopyranose;<br>TellimagrandinI;<br>PedunculaginII                                                                                                                                                |
| 39 | 7.51                         | -/-/323.1346        | -/-/59.0138, 71.0137, 89.0243, 101.0243, 113.0244                                            | C <sub>13</sub> H <sub>24</sub> O <sub>9</sub>  | Unknown                                                                                                                                                                                                                                                                               |
| 40 | 7.59                         | 818.1030/-/799.0637 | 259.0233, 277.0340, 303.0131, 337.0185, 463.0507, 765.0567, 801.0789/-/300.9989, 479.0468    | C <sub>34</sub> H <sub>24</sub> O <sub>23</sub> | Granatin A (Ellagic acid derivative)                                                                                                                                                                                                                                                  |
| 41 | 7.60, 8.28, 8.88, 9.15, 9.74 | 654.1290/-/635.0895 | 153.0182, 449.0721, 467.0818/-/125.0243, 169.0141, 313.0567, 465.0678, 483.0781              | C <sub>27</sub> H <sub>24</sub> O <sub>18</sub> | 1,2,3-tri- <i>O</i> -galloyl- $\beta$ -glucopyranose;<br>1,2,4-tri- <i>O</i> -galloyl- $\beta$ -glucopyranose;<br>1,2,6-tri- <i>O</i> -galloyl- $\beta$ -glucopyranose; 1,3,4-tri- <i>O</i> -galloyl- $\beta$ -glucopyranose;<br>1,4,6-tri- <i>O</i> -galloyl- $\beta$ -glucopyranose |
| 42 | 8.09                         | -/-/387.1664        | -/-/163.1127                                                                                 | C <sub>18</sub> H <sub>28</sub> O <sub>9</sub>  | Unknown                                                                                                                                                                                                                                                                               |
| 43 | 8.29                         | -/-/455.1772        | -/-/101.0607, 125.0244, 163.0611, 307.1036, 409.1716                                         | C <sub>18</sub> H <sub>32</sub> O <sub>13</sub> | Unknown                                                                                                                                                                                                                                                                               |
| 44 | 8.38                         | -/-/387.1663        | -/-/59.0138, 163.1127                                                                        | C <sub>18</sub> H <sub>28</sub> O <sub>9</sub>  | Unknown                                                                                                                                                                                                                                                                               |
| 45 | 8.77                         | -/-/305.0700        | -/-/59.0138, 96.9599, 225.1132                                                               | C <sub>8</sub> H <sub>18</sub> O <sub>12</sub>  | Unknown                                                                                                                                                                                                                                                                               |
| 46 | 8.78                         | 832.1186/-/813.0793 | 259.0233, 277.0337, 303.0126, 351.0341, 477.0647, 783.0665, 815.0907/-/300.9990, 479.0453    | C <sub>35</sub> H <sub>26</sub> O <sub>23</sub> | HHDP glucoside derivative                                                                                                                                                                                                                                                             |
| 47 | 8.90                         | -/-/281.1394        | -/-/171.1178, 189.1285, 237.1497                                                             | C <sub>15</sub> H <sub>22</sub> O <sub>5</sub>  | 4-(2,7-Dihydroxy-6-methyl-2-heptanyl)-3-hydroxybenzoic acid                                                                                                                                                                                                                           |
| 48 | 9.04                         | -/-/172.0872        | -/-/130.0872                                                                                 | C <sub>8</sub> H <sub>15</sub> N O <sub>3</sub> | 2-(Acetylamino)hexanoic acid                                                                                                                                                                                                                                                          |
| 49 | 9.42                         | -/-/631.0581        | -/-/125.0242, 169.0142, 217.0146, 245.0089, 273.0044, 300.9990, 445.0399, 463.0523, 613.0485 | C <sub>27</sub> H <sub>20</sub> O <sub>18</sub> | HHDP glucoside derivative<br>[(-)-vescalin; castalin; terflavin D]                                                                                                                                                                                                                    |
| 50 | 9.46                         | -/-/627.1572        | -/-/125.0242, 133.0294, 177.0192, 285.0404, 339.0726, 465.1038                               | C <sub>27</sub> H <sub>32</sub> O <sub>17</sub> | Unknown                                                                                                                                                                                                                                                                               |
| 51 | 9.65                         | 954.1190/-/935.0796 | 153.0180, 259.0235, 277.0338, 303.0129, 447.0533, 767.0712/-/275.0198, 300.9990              | C <sub>41</sub> H <sub>28</sub> O <sub>26</sub> | Casuarinin                                                                                                                                                                                                                                                                            |
| 52 | 9.70, 10.42                  | -/-/483.0311        | -/-/125.0243, 169.0140, 247.0247, 300.9988,                                                  | C <sub>8</sub> H <sub>20</sub> O <sub>23</sub>  | (Digalloyl glucoside)<br>Gallic acid 3- <i>O</i> - $\beta$ -D-(6'- <i>O</i> -                                                                                                                                                                                                         |

|    |                    |                             |                                                                                                                                                                   |                                                 |                                              |
|----|--------------------|-----------------------------|-------------------------------------------------------------------------------------------------------------------------------------------------------------------|-------------------------------------------------|----------------------------------------------|
|    |                    |                             |                                                                                                                                                                   |                                                 | galloyl)-<br>glucopyranoside                 |
| 53 | 9.74               | 986.1085/-<br>/967.0688     | 235.0233, 275.0180, 337.0183,<br>799.0611/-/247.0247, 273.0042,<br>300.9991, 905.0679, 931.0482,<br>949.0594                                                      | C <sub>41</sub> H <sub>28</sub> O <sub>28</sub> | HHDP glucoside derivative                    |
| 54 | 9.77               | -<br>/627.1542/625.1<br>412 | -/303.0494/271.0248, 300.0276                                                                                                                                     | C <sub>27</sub> H <sub>30</sub> O <sub>17</sub> | Unknown                                      |
| 55 | 9.97               | -/-/475.0335                | -/-/125.0243, 169.0140,<br>275.0198, 300.9991, 452.0313,<br>466.0285                                                                                              | C <sub>24</sub> H <sub>12</sub> O <sub>11</sub> | HHDP glucoside derivative                    |
| 56 | 10.08              | 970.1134/-<br>/951.0739     | 277.0338, 303.0130, 337.0183,<br>783.0665, 953.0862/-/273.0040,<br>300.9989, 933.0644                                                                             | C <sub>41</sub> H <sub>28</sub> O <sub>27</sub> | Granatin B (galloyl-HHDP-<br>DHHDP-hexoside) |
| 57 | 10.09              | /-/933.0646                 | /-/273.0041, 300.9990                                                                                                                                             | C <sub>41</sub> H <sub>26</sub> O <sub>26</sub> | Galloylpunicalin; Castalagin                 |
| 58 | 10.29              | 1000.1258/-<br>/981.0853    | 813.0759/-/245.0089, 273.0040,<br>300.9989, 945.0648 963.0764                                                                                                     | C <sub>42</sub> H <sub>30</sub> O <sub>28</sub> | HHDP glucoside derivative                    |
| 59 | 10.45              | 820.1175/-<br>/801.0795     | 109.0286, 153.0180, 445.0387,<br>615.0610, 633.0706/-/123.0088,<br>169.0142, 245.0089, 273.0040,<br>300.9990, 445.0423, 597.0524,<br>615.0630, 765.0571, 783.0687 | C <sub>34</sub> H <sub>26</sub> O <sub>23</sub> | Puniguconin                                  |
| 60 | 10.65              | -<br>/956.1342/937.0<br>958 | -/153.0181, 277.0339, 303.0130,<br>599.0656, 769.0869/125.0242,<br>169.0141, 249.0403,<br>275.0198, 300.9989                                                      | C <sub>41</sub> H <sub>30</sub> O <sub>26</sub> | Punicafolin                                  |
| 61 | 10.66              | -<br>/611.1653/609.1<br>475 | -/287.0550, 449.1078/271.0250,<br>300.0276                                                                                                                        | C <sub>27</sub> H <sub>30</sub> O <sub>16</sub> | Rutin                                        |
| 62 | 10.68 and<br>12.42 | -/-/335.0408                | -/-/183.0297                                                                                                                                                      | C <sub>15</sub> H <sub>12</sub> O <sub>9</sub>  | Flurtamone                                   |
| 63 | 10.77              | -<br>/467.0816/465.1<br>039 | -/137.0232, 153.0180, 179.0336,<br>305.0649/109.0292, 125.0242,<br>133.0294, 177.0192, 193.0141,<br>285.0408, 303.0510, 355.0668                                  | C <sub>21</sub> H <sub>22</sub> O <sub>12</sub> | Unknown                                      |
| 64 | 10.79              | -<br>/449.0719/447.0<br>934 | -/287.0544/285.0404                                                                                                                                               | C <sub>21</sub> H <sub>20</sub> O <sub>11</sub> | Flavonoid glycoside                          |
| 65 | 10.85              | -/-/300.9989                | -/-/300.9990                                                                                                                                                      | C <sub>14</sub> H <sub>6</sub> O <sub>8</sub>   | Ellagic acid                                 |
| 66 | 10.88              | 1122.1238/-<br>/1103.0846   | 277.0337, 303.0128, 337.0184,<br>481.0630, 783.0660, 935.0693/-<br>/273.0041, 300.9989, 933.0639,<br>951.0739                                                     | C <sub>48</sub> H <sub>32</sub> O <sub>31</sub> | HHDP glucoside derivative                    |

|    |       |                             |                                                                                                                                                                  |                                                 |                                                                                     |
|----|-------|-----------------------------|------------------------------------------------------------------------------------------------------------------------------------------------------------------|-------------------------------------------------|-------------------------------------------------------------------------------------|
| 67 | 10.98 | 806.1392/-<br>/787.0999     | 153.0180, 237.0388, 449.0707,<br>619.0920/-/125.0243, 169.0141,<br>313.0566,<br>465.0674, 617.0777                                                               | C <sub>34</sub> H <sub>28</sub> O <sub>22</sub> | 1,2,4,6-tetra- <i>O</i> -galloyl-β-D-glucose                                        |
| 68 | 11.02 | -/815.0586                  | -/123.0085, 169.0141,<br>217.0138, 245.0083, 273.0036,<br>300.9990. 615.0657, 765.0623,<br>783.0698                                                              | C <sub>35</sub> H <sub>28</sub> O <sub>23</sub> | Pedunculagin I derivative<br>(bis-HHDP glucoside derivative)                        |
| 69 | 11.24 | -<br>/483.1128/481.0<br>989 | -/127.0390, 153.0180, 195.0286,<br>312.0600/125.0243, 149.0243,<br>193.0142, 257.0455, 355.0670,<br>463.0889                                                     | C <sub>21</sub> H <sub>22</sub> O <sub>13</sub> | Unknown                                                                             |
| 70 | 11.64 | -<br>/449.0719/447.0<br>934 | -/287.0544/285.0404                                                                                                                                              | C <sub>21</sub> H <sub>20</sub> O <sub>11</sub> | Cynaroside (Luteolin 7- <i>O</i> -glycoside);<br>Kaempferol 4'- <i>O</i> -glucoside |
| 71 | 11.68 | 984.1292/-<br>/965.0900     | 277.0338, 303.0130, 351.0338,<br>797.0815/-/245.0089, 273.0042,<br>300.9991                                                                                      | C <sub>42</sub> H <sub>30</sub> O <sub>27</sub> | Pedunculagin I derivative<br>(Bis-HHDP glucoside derivative)                        |
| 72 | 11.81 | -<br>/451.1001/449.1<br>093 | -/121.0285, 127.0389, 153.0180,<br>163.0387, 289.0700/93.0345,<br>117.0345, 125.0242, 149.0242,<br>167.0348, 193.0142, 269.0454,<br>287.0540, 313.0574, 355.0666 | C <sub>21</sub> H <sub>22</sub> O <sub>11</sub> | Hovetrichoside C                                                                    |
| 73 | 11.91 | 972.1294/-<br>/953.0890     | 153.0180, 785.0811/-/125.0243,<br>169.0141, 217.0142, 245.0092,<br>273.0041, 300.9990, 617.0771,<br>767.0731, 917.0720, 935.0803                                 | C <sub>41</sub> H <sub>30</sub> O <sub>27</sub> | Galloyl-bis-HHDP-hexoside                                                           |
| 74 | 12.28 | 958.1503/-<br>/939.1109     | 153.0181, 771.1024/-/125.0242,<br>169.0141, 465.0683, 769.0901                                                                                                   | C <sub>41</sub> H <sub>32</sub> O <sub>26</sub> | 1,2,3,4,6-penta- <i>O</i> -galloyl-β-D-glucose                                      |
| 75 | 12.61 | 1108.1454/-<br>/1089.1057   | 153.0180, 303.0125, 599.0649,<br>769.0908, 921.0995/-/125.0139,<br>169.0139, 275.0200, 300.9990,<br>937.0954                                                     | C <sub>48</sub> H <sub>34</sub> O <sub>30</sub> | HHDP glucoside derivative                                                           |
| 76 | 12.90 | -<br>/305.0650/303.0<br>511 | -/137.0232, 153.0180,<br>179.0335/109.0293, 125.0242,<br>133.0294, 151.0399, 177.0191,<br>193.0142                                                               | C <sub>15</sub> H <sub>12</sub> O <sub>7</sub>  | Unknown                                                                             |
| 77 | 13.04 | -<br>/273.0754/271.0<br>147 | -/147.0439, 153.0180,<br>171.0285/119.0501, 151.0037,<br>177.0193                                                                                                | C <sub>15</sub> H <sub>12</sub> O <sub>5</sub>  | Naringenin                                                                          |
| 78 | 13.05 | -<br>/449.0719/447.0<br>934 | -/287.0544/285.0404                                                                                                                                              | C <sub>21</sub> H <sub>20</sub> O <sub>11</sub> | Kaempferol 7- <i>O</i> -glucoside                                                   |
| 79 | 13.11 | -                           | -/151.0035, 271.0613,                                                                                                                                            | C <sub>20</sub> H <sub>18</sub> O <sub>11</sub> | Unknown                                                                             |

|    |                 |                         |                                                                                       |                                                 |                                                                                      |
|----|-----------------|-------------------------|---------------------------------------------------------------------------------------|-------------------------------------------------|--------------------------------------------------------------------------------------|
|    |                 | /435.0918/433.0780      | 301.0353                                                                              |                                                 |                                                                                      |
| 80 | 13.32,<br>13.59 | -/-461.1093             | -/-255.0295, 283.0247,<br>298.0479, 313.0345, 446.0860                                | C <sub>22</sub> H <sub>22</sub> O <sub>11</sub> | Unknown                                                                              |
| 81 | 13.50           | -<br>/451.1001/449.1094 | -/121.0286, 127.0392, 153.0182,<br>163.0389, 289.0702/135.0451,<br>151.0036, 287.0562 | C <sub>21</sub> H <sub>22</sub> O <sub>11</sub> | Hovetrichoside C                                                                     |
| 82 | 13.71           | -<br>/449.0719/447.0934 | -/287.0544/285.0404                                                                   | C <sub>21</sub> H <sub>20</sub> O <sub>11</sub> | Flavonoid glycosides                                                                 |
| 83 | 13.73           | -<br>/465.1020/463.0885 | -/303.0497/301.0354                                                                   | C <sub>21</sub> H <sub>20</sub> O <sub>12</sub> | Tricetin 4'-O-β-glucopyranoside                                                      |
| 84 | 13.82           | -<br>/303.0494/301.0352 | -/303.0497/301.0354                                                                   | C <sub>15</sub> H <sub>10</sub> O <sub>7</sub>  | Tricetin                                                                             |
| 85 | 13.96           | -<br>/317.0652/315.0512 | -/302.0421/300.0276                                                                   | C <sub>16</sub> H <sub>12</sub> O <sub>7</sub>  | Isorhamnetin                                                                         |
| 86 | 13.99           | -<br>/479.1178/477.1039 | -/317.0053/300.0275, 315.0511                                                         | C <sub>21</sub> H <sub>22</sub> O <sub>12</sub> | 6-O-[(2E)-3-(4-Hydroxyphenyl)-2-propenoyl]-1-O-(3,4,5-trihydroxybenzoyl)hexopyranose |
| 87 | 14.66           | -/-487.0522             | -/-183.0297, 335.0410                                                                 | C <sub>22</sub> H <sub>16</sub> O <sub>13</sub> | Unknown                                                                              |
| 88 | 14.71           | -<br>/289.0701/287.0562 | -/121.0285, 153.0181,<br>163.0388/93.0344, 117.0345,<br>125.0243, 193.0141            | C <sub>15</sub> H <sub>12</sub> O <sub>6</sub>  | Eriodictyol                                                                          |
| 89 | 14.73           | -/-125.0243             | -/-57.0345                                                                            | C <sub>6</sub> H <sub>6</sub> O <sub>3</sub>    | Phloroglucinol                                                                       |
| 90 | 14.75           | -/-193.0141             | -/-149.0243, 151.0035                                                                 | C <sub>9</sub> H <sub>6</sub> O <sub>5</sub>    | Unknown                                                                              |
| 91 | 14.83           | -<br>/419.0967/417.0830 | -/287.0543/285.0404                                                                   | C <sub>20</sub> H <sub>18</sub> O <sub>10</sub> | Luteolin 3'-O-β-xylopyranoside                                                       |
| 92 | 15.30           | -/-263.1288             | -/-151.0764, 201.1280,<br>204.1155, 219.1390                                          | C <sub>15</sub> H <sub>20</sub> O <sub>4</sub>  | Abscisic acid                                                                        |
| 93 | 15.80           | -<br>/287.0545/285.0405 | -/287.0544/285.0406                                                                   | C <sub>15</sub> H <sub>10</sub> O <sub>6</sub>  | Luteolin                                                                             |
| 94 | 15.98           | -<br>/317.0650/315.0511 | -/302.0415/272.0329, 300.0275                                                         | C <sub>16</sub> H <sub>12</sub> O <sub>7</sub>  | Isorhamnetin                                                                         |
| 95 | 17.80           | -<br>/271.0597/269.0    | -/271.0595/269.0456                                                                   | C <sub>15</sub> H <sub>10</sub> O <sub>5</sub>  | Apigenin                                                                             |

|     |       |                             |                                                                            |                                                   |                                                               |
|-----|-------|-----------------------------|----------------------------------------------------------------------------|---------------------------------------------------|---------------------------------------------------------------|
|     |       | 456                         |                                                                            |                                                   |                                                               |
| 96  | 18.20 | -<br>/275.0910/273.0<br>769 | -/107.0494/119.0499, 123.0451,<br>167.0348                                 | C <sub>15</sub> H <sub>14</sub> O <sub>5</sub>    | Phloretin                                                     |
| 97  | 18.30 | -<br>/301.0701/299.0<br>561 | -/286.0465/256.0377, 284.0327                                              | C <sub>16</sub> H <sub>12</sub> O <sub>6</sub>    | Unknown                                                       |
| 98  | 18.71 | -<br>/331.0805/327.2<br>178 | -/315.0495, 331.0809/171.1026,<br>211.1339, 229.1444                       | C <sub>18</sub> H <sub>32</sub> O <sub>5</sub>    | Corchorifatty acid F                                          |
| 99  | 19.74 | -/-/457.1720                | -/-/125.0244, 169.0142                                                     | C <sub>21</sub> H <sub>30</sub> O <sub>11</sub>   | Unknown                                                       |
| 100 | 19.88 | -/-/401.0878                | -/-/121.0294, 225.0558,<br>313.0725                                        | C <sub>20</sub> H <sub>18</sub> O <sub>9</sub>    | Unknown                                                       |
| 101 | 19.95 | -/-/329.2334                | -/-/171.1026, 211.1340,<br>229.1444                                        | C <sub>18</sub> H <sub>34</sub> O <sub>5</sub>    | (15Z)-9,12,13-Trihydroxy-15-octadecenoic acid                 |
| 102 | 21.49 | -/-/643.2777                | -/-/136.0767, 190.0507,<br>339.1352, 611.2536                              | C <sub>34</sub> H <sub>44</sub> O <sub>12</sub>   | Unknown                                                       |
| 103 | 21.68 | -/-/293.1759                | -/-/221.1546, 236.1053                                                     | C <sub>17</sub> H <sub>26</sub> O <sub>4</sub>    | Unknown                                                       |
| 104 | 21.70 | -<br>/489.2850/487.3<br>434 | -/147.0441/487.3434                                                        | C <sub>30</sub> H <sub>48</sub> O <sub>5</sub>    | Asiatic acid                                                  |
| 105 | 21.86 | -/-/309.1709                | -/-/162.1049, 219.1753,<br>281.1758                                        | C <sub>17</sub> H <sub>26</sub> O <sub>5</sub>    | Unknown                                                       |
| 106 | 21.92 | -/-/239.1289                | -/-/154.0635, 167.1440,<br>195.1390                                        | C <sub>13</sub> H <sub>20</sub> O <sub>4</sub>    | Unknown                                                       |
| 107 | 22.13 | -/-/473.3639                | -/-/473.3638                                                               | C <sub>30</sub> H <sub>50</sub> O <sub>4</sub>    | Punicanolic acid                                              |
| 108 | 22.62 | -/-/471.3483                | -/-/471.3481                                                               | C <sub>30</sub> H <sub>48</sub> O <sub>4</sub>    | Unknown                                                       |
| 109 | 22.71 | -<br>/279.0930/277.1<br>444 | -/149.0232/121.0293, 127.1127,<br>134.0372                                 | C <sub>16</sub> H <sub>22</sub> O <sub>4</sub>    | Mono(2-ethylhexyl) phthalate                                  |
| 110 | 23.09 | -/-/452.2784                | -/-/255.2330                                                               | C <sub>21</sub> H <sub>44</sub> NO <sub>7</sub> P | Glycerophospho-N-palmitoyl ethanolamine                       |
| 111 | 23.05 | -/-/265.1479                | -/-/96.9600                                                                | C <sub>12</sub> H <sub>26</sub> O <sub>4</sub> S  | Dodecyl sulfate                                               |
| 112 | 23.35 | -/-/347.1714                | -/-/217.0713, 301.1661                                                     | C <sub>16</sub> H <sub>28</sub> O <sub>8</sub>    | Unknown                                                       |
| 113 | 23.94 | -<br>/457.3675/455.3<br>532 | -/95.0800, 189.1637, 261.1845,<br>393.3515, 411.3629,<br>439.3566/455.3533 | C <sub>30</sub> H <sub>48</sub> O <sub>3</sub>    | Ursolic acid; Oleanolic acid;<br>Hydroxyurs-12-en-23-oic acid |
| 114 | 24.11 | -/-/339.2331                | -/-/163.1129                                                               | C <sub>23</sub> H <sub>32</sub> O <sub>2</sub>    | 2,2'-methylenebis(4-methyl-6-tert-butylphenol)                |
| 115 | 24.37 | -/-/271.2279                | -/-/225.2223                                                               | C <sub>16</sub> H <sub>32</sub> O <sub>3</sub>    | 16-hydroxyhexadecanoic acid                                   |

**Table S2.** High-resolution electrospray ionization mass spectrometry (HR-ESI-MS) data of metabolites extracted from pomegranate petals. Rt, retention time.

| Peak | R <sub>t</sub> (min) | [M+NH <sub>4</sub> ] <sup>+</sup> /[M+H] <sup>+</sup><br>/[M-H] <sup>-</sup> (m/z) | MS/MS (m/z)                                                                                                             | Calculated<br>formula                                       | Tentative identification        |
|------|----------------------|------------------------------------------------------------------------------------|-------------------------------------------------------------------------------------------------------------------------|-------------------------------------------------------------|---------------------------------|
| 1    | 1.01                 | -/-/181.0715                                                                       | -/-/59.0137, 71.0137, 89.0243,<br>101.0242, 119.0347, 131.0349,<br>163.0610, 181.0716                                   | C <sub>6</sub> H <sub>14</sub> O <sub>6</sub>               | D-(-)-mannitol                  |
| 2    | 1.03                 | -/-/135.0297                                                                       | -/-/75.0087, 89.0244                                                                                                    | C <sub>4</sub> H <sub>8</sub> O <sub>5</sub>                | L-Threonic acid                 |
| 3    | 1.03                 | -/-/146.0458                                                                       | -/-/102.059, 128.0352                                                                                                   | C <sub>5</sub> H <sub>9</sub> N O <sub>4</sub>              | L-Glutamic acid                 |
| 4    | 1.04                 | -/-/341.1091                                                                       | -/-/59.0138, 71.0137, 89.0243,<br>101.0243, 119.0347, 179.0560,<br>341.1091                                             | C <sub>12</sub> H <sub>22</sub> O <sub>11</sub>             | Trehalose                       |
| 5    | 1.04                 | -/-/165.0402                                                                       | -/-/75.0086, 129.0192                                                                                                   | C <sub>6</sub> H <sub>6</sub> N <sub>4</sub> O <sub>2</sub> | 7-Methylxanthine                |
| 6    | 1.04                 | -/381.0788/-                                                                       | -/381.0784/-                                                                                                            | C <sub>17</sub> H <sub>16</sub> O <sub>10</sub>             | Unknown                         |
| 7    | 1.06                 | -/-/377.0853                                                                       | -/-/341.1091                                                                                                            | C <sub>18</sub> H <sub>18</sub> O <sub>9</sub>              | Unknown                         |
| 8    | 1.06                 | -/-/179.0559                                                                       | -/-/59.0138, 75.0086, 143.0349,<br>161.0454                                                                             | C <sub>6</sub> H <sub>12</sub> O <sub>6</sub>               | D-(-)-Fructose                  |
| 9    | 1.09                 | -/-/149.0453                                                                       | -/-/59.0138, 75.0086, 131.0348                                                                                          | C <sub>5</sub> H <sub>10</sub> O <sub>5</sub>               | D-(-)-Arabinose                 |
| 10   | 1.14                 | -/-/259.0294                                                                       | -/78.9589, 96.9692, 138.9702,<br>198.9908                                                                               | C <sub>6</sub> H <sub>13</sub> O <sub>9</sub> P             | D-Glucose 6-phosphate           |
| 11   | 1.23                 | -/-/439.0858                                                                       | -/-/78.9589, 96.9694                                                                                                    | C <sub>19</sub> H <sub>20</sub> O <sub>12</sub>             | Unknown                         |
| 12   | 1.30                 | -/136.02/134.0142                                                                  | -/91.05, 119.05, 136.02/71.0138,<br>89.0243, 115.0036, 133.0142                                                         | C <sub>4</sub> H <sub>6</sub> O <sub>5</sub>                | Malic acid                      |
| 13   | 1.53                 | -/-/481.0627                                                                       | -/-/275.0198, 300.9989                                                                                                  | C <sub>20</sub> H <sub>18</sub> O <sub>14</sub>             | HHDP glucoside derivative       |
| 14   | 1.58                 | -/-/191.0197                                                                       | -/-/85.0294, 87.0086, 111.0086,<br>129.0193                                                                             | C <sub>6</sub> H <sub>8</sub> O <sub>7</sub>                | D-(-)-Quinic acid ; Citric acid |
| 15   | 1.71                 | -/-/645.1889                                                                       | -/-/71.0137, 113.0243                                                                                                   | C <sub>24</sub> H <sub>38</sub> O <sub>20</sub>             | Unknown                         |
| 16   | 1.81,<br>7.12        | -/315.0710/-                                                                       | -/153.0180/-                                                                                                            | C <sub>13</sub> H <sub>14</sub> O <sub>9</sub>              | Unknown                         |
| 17   | 1.87                 | 350.0997/-<br>/331.0670                                                            | 109.0287, 127.0389, 145.0495,<br>153.0179, 171.0285, 315.0710/-<br>/125.0242, 151.0036, 169.0140,<br>211.0246, 271.0454 | C <sub>13</sub> H <sub>16</sub> O <sub>10</sub>             | Galloyl glucoside               |
| 18   | 2.26                 | -<br>/171.0288/169.01<br>41                                                        | -/81.0341, 107.0130, 109.0286,<br>125.0233, 127.0389,<br>153.0180/125.0242                                              | C <sub>7</sub> H <sub>6</sub> O <sub>5</sub>                | Gallic acid                     |
| 19   | 2.27                 | -/-/777.2307                                                                       | -/-/113.0242                                                                                                            | C <sub>29</sub> H <sub>46</sub> O <sub>24</sub>             | Unknown                         |
| 20   | 2.57                 | -<br>/345.0814/343.06<br>70                                                        | -/153.0180/191.0560                                                                                                     | C <sub>14</sub> H <sub>16</sub> O <sub>10</sub>             | Unknown                         |
| 21   | 4.45                 | -/-/218.1033                                                                       | -/-/88.0403, 146.0822                                                                                                   | C <sub>9</sub> H <sub>17</sub> NO <sub>5</sub>              | Pantothenic acid                |
| 22   | 4.46                 | -/-/325.0565                                                                       | -/-/93.0343, 125.0242, 169.0141                                                                                         | C <sub>14</sub> H <sub>14</sub> O <sub>9</sub>              | Unknown                         |
| 23   | 4.79                 | -/-/487.1096                                                                       | -/-/125.0242, 169.0140, 211.0250,                                                                                       | C <sub>20</sub> H <sub>24</sub> O <sub>14</sub>             | Galloyl-hexoside derivative     |



|    |                        |                             |                                                                                                                                   |                                                              |                                                                                                                                                                                                                                               |
|----|------------------------|-----------------------------|-----------------------------------------------------------------------------------------------------------------------------------|--------------------------------------------------------------|-----------------------------------------------------------------------------------------------------------------------------------------------------------------------------------------------------------------------------------------------|
|    |                        |                             | 331.0663, 469.0993                                                                                                                |                                                              |                                                                                                                                                                                                                                               |
| 24 | 4.99                   | -/-/299.0771                | -/-/59.0137, 71.0137, 89.0242, 101.0242, 119.0349, 137.0243, 179.0348, 239.0564                                                   | C <sub>13</sub> H <sub>16</sub> O <sub>8</sub>               | Unknown                                                                                                                                                                                                                                       |
| 25 | 5.45                   | -/-/315.0722                | -/-/125.0238, 151.0037, 169.0138                                                                                                  | C <sub>13</sub> H <sub>16</sub> O <sub>9</sub>               | Galloyl-hexoside derivative                                                                                                                                                                                                                   |
| 26 | 6.54                   | -/-/315.0511                | -/-/153.0192                                                                                                                      | C <sub>13</sub> H <sub>16</sub> O <sub>9</sub>               | Unknown                                                                                                                                                                                                                                       |
| 27 | 6.62                   | -/595.1650/-                | -/271.0594, 433.1121/-                                                                                                            | C <sub>27</sub> H <sub>31</sub> O <sub>15</sub> <sup>+</sup> | Cyanidin-3- <i>O</i> -rutinose                                                                                                                                                                                                                |
| 28 | 6.63                   | -/-/611.1616                | -/-/93.0344, 149.0242, 165.0191, 193.0141, 269.0456, 287.0561, 355.0671, 449.1091                                                 | C <sub>27</sub> H <sub>31</sub> O <sub>16</sub> <sup>+</sup> | Cyanidin-3,5-di- <i>O</i> -glucoside                                                                                                                                                                                                          |
| 29 | 6.99                   | -<br>/185.0442/183.02<br>97 | -/126.0311, 153.0180, 171.0285/124.0164, 168.0063                                                                                 | C <sub>8</sub> H <sub>6</sub> O <sub>5</sub>                 | Unknown                                                                                                                                                                                                                                       |
| 30 | 7.01                   | -/-/957.0849                | -/-/275.0198, 300.9989                                                                                                            | C <sub>40</sub> H <sub>30</sub> O <sub>28</sub>              | HHDP glucoside derivative                                                                                                                                                                                                                     |
| 31 | 7.09                   | -/-/483.0782                | -/-/125.0243, 169.0141, 211.0247, 271.0459, 313.0561, 331.0685                                                                    | C <sub>20</sub> H <sub>20</sub> O <sub>14</sub>              | Galloyl-hexoside derivative                                                                                                                                                                                                                   |
| 32 | 7.30,<br>8.53          | 804.1237/-<br>/785.0848     | 153.0181, 259.0233, 277.0338, 303.0131, 467.0816, 617.0771, 787.1013/-/125.0242, 169.0140, 231.0297, 249.0403, 275.0198, 300.9989 | C <sub>34</sub> H <sub>26</sub> O <sub>22</sub>              | 1,2-di- <i>O</i> -galloyl-4,6- <i>O</i> -( <i>S</i> )-hexahydroxydiphenyl-β-D-glucopyranoside;<br>Tercatain/1,4-di- <i>O</i> -galloyl-3,6-( <i>R</i> )-hexahydroxydiphenyl-β-glucopyranose;<br>TellimagrandinI;<br>PedunculaginII             |
| 33 | 7.62                   | 818.1035/-<br>/799.0640     | 259.0233, 277.0340, 303.0131, 337.0185, 463.0507, 765.0567, 801.0789/-/300.9989, 479.0467                                         | C <sub>34</sub> H <sub>24</sub> O <sub>23</sub>              | Granatin A (Ellagic acid derivative)                                                                                                                                                                                                          |
| 34 | 7.67                   | 652.1132/-<br>/633.0738     | 259.0233, 277.0338, 303.0129, 447.0553/-/169.0140, 249.0404, 275.0195, 300.9988                                                   | C <sub>27</sub> H <sub>22</sub> O <sub>18</sub>              | 6- <i>O</i> -galloyl-2, 3-( <i>S</i> ) - hexahydroxydiphenyl -D-glucose; Corilagin; Isocorilagin; Hippomanin A; Gemin D; Strictinin (galloyl HHDP glucoside)                                                                                  |
| 35 | 8.27,<br>8.87,<br>9.69 | 654.1293/-<br>/635.0891     | -153.0182, 449.0721, 467.0818/-/125.0242, 169.0141, 313.0566, 465.0673                                                            | C <sub>27</sub> H <sub>24</sub> O <sub>18</sub>              | 1,2,3-tri- <i>O</i> -galloyl-β-glucopyranose;<br>1,2,4-tri- <i>O</i> -galloyl-β-glucopyranose;<br>1,2,6-tri- <i>O</i> -galloyl-β-glucopyranose; 1,3,4-tri- <i>O</i> -galloyl-β-glucopyranose;<br>1,4,6-tri- <i>O</i> -galloyl-β-glucopyranose |
| 36 | 8.48,                  | -/433.1127/-                | -/271.0594/-                                                                                                                      | C <sub>21</sub> H <sub>20</sub> O <sub>10</sub>              | Unknown                                                                                                                                                                                                                                       |

|    |                 |                             |                                                                                                                                                                   |                                                 |                                                                       |
|----|-----------------|-----------------------------|-------------------------------------------------------------------------------------------------------------------------------------------------------------------|-------------------------------------------------|-----------------------------------------------------------------------|
|    | 13.07           |                             |                                                                                                                                                                   |                                                 |                                                                       |
| 37 | 8.73            | 832.1191/-<br>/813.0797     | 259.0233, 277.0337, 303.0126,<br>351.0341, 477.0647, 783.0665,<br>815.0907/-/300.9989, 479.0470                                                                   | C <sub>35</sub> H <sub>26</sub> O <sub>23</sub> | HHDP glucoside derivative                                             |
| 38 | 8.83            | -/-/305.0700                | -/-/59.0138, 96.9599, 225.1132                                                                                                                                    | C <sub>8</sub> H <sub>18</sub> O <sub>12</sub>  | Unknown                                                               |
| 39 | 8.89,<br>9.70   | -/467.0819/-                | -/153.0179/-                                                                                                                                                      | C <sub>20</sub> H <sub>18</sub> O <sub>13</sub> | Unknown                                                               |
| 40 | 9.11            | -<br>/451.1225/449.10<br>93 | -/121.0284, 289.0699/125.0242,<br>259.0610, 287.0562, 421.1139                                                                                                    | C <sub>21</sub> H <sub>22</sub> O <sub>11</sub> | Hovetrichoside C                                                      |
| 41 | 9.26            | -/-/329.0878                | -/-/123.0450, 167.0348                                                                                                                                            | C <sub>14</sub> H <sub>18</sub> O <sub>9</sub>  | Unknown                                                               |
| 42 | 9.43            | -/-/631.0580                | -/-/125.0242, 169.0141, 217.0139,<br>245.0090, 273.0041, 300.9988,<br>445.0415, 463.0515, 613.0463                                                                | C <sub>27</sub> H <sub>20</sub> O <sub>18</sub> | HHDP glucoside derivative<br>[(-)-vescalin; castalin;<br>terflavin D] |
| 43 | 9.47            | -<br>/449.0719/447.09<br>33 | -/287.0544/165.0191, 285.0404,<br>327.0722                                                                                                                        | C <sub>21</sub> H <sub>20</sub> O <sub>11</sub> | Flavonoid glycosides                                                  |
| 44 | 9.53            | 646.1968/-<br>/627.1567     | 95.0495, 121.0284, 139.0388,<br>167.0337, 305.0648/-/139.0399,<br>165.0191, 345.0826, 447.0933                                                                    | C <sub>27</sub> H <sub>32</sub> O <sub>17</sub> | Unknown                                                               |
| 45 | 9.71,<br>10.39  | 986.1091/-<br>/967.0685     | 235.0233, 275.0180, 337.0183,<br>799.0611/-/247.0246, 273.0040,<br>300.9989, 905.0681, 931.0482,<br>949.0578                                                      | C <sub>41</sub> H <sub>28</sub> O <sub>28</sub> | HHDP glucoside derivative                                             |
| 46 | 9.79            | -<br>/611.1653/609.14<br>75 | -/287.0550, 449.1078/285.0403,<br>447.0932                                                                                                                        | C <sub>27</sub> H <sub>30</sub> O <sub>16</sub> | Rutin                                                                 |
| 47 | 10.14           | 820.1189/-<br>/801.0789     | 109.0286, 153.0180, 445.0387,<br>615.0610, 633.0706/-/123.0086,<br>169.0142, 245.0089, 273.0039,<br>300.9988, 445.0423, 597.0524,<br>615.0630, 765.0580, 783.0685 | C <sub>34</sub> H <sub>26</sub> O <sub>23</sub> | Punigluconin                                                          |
| 48 | 10.15           | 970.1136/-<br>/951.0737     | 277.0338, 303.0130, 337.0183,<br>783.0665, 953.0862/-/273.0040,<br>300.9988, 933.0644                                                                             | C <sub>41</sub> H <sub>28</sub> O <sub>27</sub> | Granatin B (galloyl-HHDP-<br>DHHDP-hexoside)                          |
| 49 | 10.37,<br>12.28 | 1000.1258/-<br>/981.0852    | 813.0759/-/245.0089, 273.0040,<br>300.9988, 945.0665, 963.0736                                                                                                    | C <sub>42</sub> H <sub>30</sub> O <sub>28</sub> | HHDP glucoside derivative                                             |
| 50 | 10.55,<br>11.14 | 1144.1307/-<br>/1125.0906   | 109.0286, 153.0181, 221.0075,<br>337.0183, 449.0366, 957.0822/-<br>/247.0246, 273.0041, 300.9988,<br>907.0856, 933.0618, 949.0560,<br>1081.0951                   | C <sub>47</sub> H <sub>34</sub> O <sub>33</sub> | HHDP glucoside derivative                                             |
| 51 | 10.78           | 1128.1356/-                 | 221.0076, 303.0128, 941.0868/-                                                                                                                                    | C <sub>47</sub> H <sub>34</sub> O <sub>32</sub> | bis-HHDP glucoside                                                    |

|    |                 |                             |                                                                                                                                                                   |                                                 |                                                                 |
|----|-----------------|-----------------------------|-------------------------------------------------------------------------------------------------------------------------------------------------------------------|-------------------------------------------------|-----------------------------------------------------------------|
|    |                 | /1109.0951                  | /275.0197, 300.9988, 633.0724,<br>935.0798                                                                                                                        |                                                 | derivative                                                      |
| 52 | 10.97           | -/-497.3349                 | -/-433.3182, 451.3292                                                                                                                                             | C <sub>24</sub> H <sub>50</sub> O <sub>10</sub> | Unknown                                                         |
| 53 | 11.00           | -/453.3429/-                | -/100.1124, 210.1485, 435.3331/-                                                                                                                                  | C <sub>23</sub> H <sub>48</sub> O <sub>8</sub>  | Unknown                                                         |
| 54 | 11.08           | 834.1350/-<br>/815.0955     | 81.0341, 109.0286, 153.0179,<br>445.0390, 615.0604, 647.0864/-<br>/123.0085, 169.0141, 217.0138,<br>245.0089, 273.0042, 300.9990.<br>615.0608, 765.0570, 783.0682 | C <sub>35</sub> H <sub>28</sub> O <sub>23</sub> | Pedunculagin I derivative<br>(bis-HHDP glucoside<br>derivative) |
| 55 | 11.21           | 806.1392/-<br>/787.1005     | 153.0180, 237.0388, 449.0707,<br>619.0920/-/125.0243, 169.0141,<br>313.0580, 465.0677, 617.0788                                                                   | C <sub>34</sub> H <sub>28</sub> O <sub>22</sub> | 1,2,4,6-tetra- <i>O</i> -galloyl- $\beta$ -D-<br>glucose        |
| 56 | 11.62           | 984.1292/-<br>/965.0898     | 277.0338, 303.0130, 351.0338,<br>797.0815/-/245.0089, 273.0041,<br>300.9989                                                                                       | C <sub>42</sub> H <sub>30</sub> O <sub>27</sub> | Pedunculagin I derivative<br>(Bis-HHDP glucoside<br>derivative) |
| 57 | 11.89           | 972.1292/-<br>/953.0889     | 153.0180, 785.0811/-/125.0243,<br>169.0141, 217.0142, 245.0092,<br>273.0041, 300.9990, 617.0811,<br>767.0731, 917.0720, 935.0793                                  | C <sub>41</sub> H <sub>30</sub> O <sub>27</sub> | Galloyl-bis-HHDP-hexoside                                       |
| 58 | 12.06,<br>12.64 | 680.1086/-<br>/661.0690     | 69.0342, 127.0390, 153.0178,<br>245.0071, 305.0286, 331.0076,<br>349.0176, 475.0492, 493.0602/-<br>/217.0146, 303.0143, 491.0478                                  | C <sub>28</sub> H <sub>22</sub> O <sub>19</sub> | Unknown                                                         |
| 59 | 12.24           | -/-441.1980                 | -/-101.0243, 263.1496, 395.1918                                                                                                                                   | C <sub>18</sub> H <sub>34</sub> O <sub>12</sub> | Unknown                                                         |
| 60 | 12.25           | -/-395.1923                 | -/-101.0243, 113.0244, 161.0452,<br>263.1502                                                                                                                      | C <sub>17</sub> H <sub>32</sub> O <sub>10</sub> | Unknown                                                         |
| 61 | 12.55           | -<br>/449.1072/447.09<br>36 | -/287.0544/227.0349, 255.0297,<br>284.0326, 285.0401                                                                                                              | C <sub>21</sub> H <sub>20</sub> O <sub>11</sub> | Astragaline<br>(Kaempferol -3- <i>O</i> -glucoside)             |
| 62 | 13.14           | -<br>/433.1127/431.09<br>85 | -/271.0595/268.0376, 269.0454                                                                                                                                     | C <sub>21</sub> H <sub>20</sub> O <sub>10</sub> | Apigenin 4'- <i>O</i> - $\beta$ -<br>glucopyranoside            |
| 63 | 13.88           | -/-455.2136                 | -/-71.0137, 101.0243,<br>277.1653,409.2078                                                                                                                        | C <sub>19</sub> H <sub>36</sub> O <sub>12</sub> | Unknown                                                         |
| 64 | 14.73           | -<br>/289.0701/287.05<br>61 | -/121.0285, 153.0181,<br>163.0388/93.0344, 117.0342,<br>125.0243, 167.0351, 193.0141                                                                              | C <sub>15</sub> H <sub>12</sub> O <sub>6</sub>  | Eriodictyol                                                     |
| 65 | 15.02           | -/-435.1299                 | -/-167.0348, 273.0769, 297.0772                                                                                                                                   | C <sub>21</sub> H <sub>24</sub> O <sub>10</sub> | Phlorizin                                                       |
| 66 | 15.11           | -/-515.1772                 | -/-125.0241, 169.0140,<br>201.1132,225.1135, 243.1235,<br>363.1662                                                                                                | C <sub>23</sub> H <sub>32</sub> O <sub>13</sub> | Unknown                                                         |
| 67 | 16.18           | -/-569.3182                 | -/-287.2227, 449.2758, 523.3090                                                                                                                                   | C <sub>26</sub> H <sub>50</sub> O <sub>13</sub> | Unknown                                                         |
| 68 | 18.74           | -/-615.2659                 | -/-125.0241, 169.0137, 283.1910,                                                                                                                                  | C <sub>29</sub> H <sub>44</sub> O <sub>14</sub> | Unknown                                                         |

|    |       |                             |                                            |                                                      |                                                   |
|----|-------|-----------------------------|--------------------------------------------|------------------------------------------------------|---------------------------------------------------|
|    |       |                             | 301.2025                                   |                                                      |                                                   |
| 69 | 19.87 | -/-/401.0876                | -/-/121.0293, 225.0553, 313.0717           | C <sub>20</sub> H <sub>18</sub> O <sub>9</sub>       | Unknown                                           |
| 70 | 19.98 | -/-/357.0616                | -/-/121.0293, 357.0617                     | C <sub>18</sub> H <sub>14</sub> O <sub>8</sub>       | Unknown                                           |
| 71 | 21.40 | -/-/503.3378                | -/-/503.3378                               | C <sub>30</sub> H <sub>48</sub> O <sub>6</sub>       | Arjungenin                                        |
| 72 | 21.50 | -/-/549.3436                | -/-/503.3377                               | C <sub>31</sub> H <sub>50</sub> O <sub>8</sub>       | Unknown                                           |
| 73 | 21.72 | -<br>/489.2850/487.34<br>27 | -/147.0441/487.3430                        | C <sub>30</sub> H <sub>48</sub> O <sub>5</sub>       | Asiatic acid                                      |
| 74 | 21.82 | -/-/309.1707                | -/-/162.1049, 219.1753, 281.1758           | C <sub>17</sub> H <sub>26</sub> O <sub>5</sub>       | Unknown                                           |
| 75 | 21.90 | -/-/239.1289                | -/-/154.0635, 167.1440, 195.1390           | C <sub>13</sub> H <sub>20</sub> O <sub>4</sub>       | Unknown                                           |
| 76 | 22.13 | -/-/473.3637                | -/-/473.3638                               | C <sub>30</sub> H <sub>50</sub> O <sub>4</sub>       | Punicanolic acid                                  |
| 77 | 22.29 | -/-/485.3275                | -/-/455.3180                               | C <sub>30</sub> H <sub>46</sub> O <sub>5</sub>       | Unknown                                           |
| 78 | 22.64 | -/-/471.3482                | -/-/471.3481                               | C <sub>30</sub> H <sub>48</sub> O <sub>4</sub>       | Unknown                                           |
| 79 | 22.70 | -<br>/279.0930/277.14<br>44 | -/149.0232/121.0293, 127.1127,<br>134.0372 | C <sub>16</sub> H <sub>22</sub> O <sub>4</sub>       | Mono(2-ethylhexyl) phthalate                      |
| 80 | 23.09 | -/-/452.2784                | -/-/255.2330                               | C <sub>21</sub> H <sub>44</sub> NO <sub>7</sub><br>P | Glycerophospho-N-palmitoyl<br>ethanolamine        |
| 81 | 23.31 | -/-/265.1479                | -/-/96.9600                                | C <sub>12</sub> H <sub>26</sub> O <sub>4</sub> S     | Dodecyl sulfate                                   |
| 82 | 23.36 | -/-/347.1713                | -/-/217.0713, 301.1661                     | C <sub>16</sub> H <sub>28</sub> O <sub>8</sub>       | Unknown                                           |
| 83 | 23.94 | -/-/455.3530                | -/-/455.3532                               | C <sub>30</sub> H <sub>48</sub> O <sub>3</sub>       | Ursolic acid; Oleanolic acid                      |
| 84 | 24.11 | -/-/339.2325                | -/-/163.1129                               | C <sub>23</sub> H <sub>32</sub> O <sub>2</sub>       | 2,2'-methylenebis(4-methyl-<br>6-tert-butylphenol |
| 85 | 25.17 | -/-/325.1842                | -/-/183.0118                               | C <sub>18</sub> H <sub>30</sub> O <sub>3</sub> S     | 4-Dodecylbenzenesulfonic<br>acid                  |

**Table S3.** Summary of RNAseq data.

| Sample     | Raw reads | Raw bases<br>(bp) | Clean<br>reads | Clean bases<br>(bp) | Error rate<br>(%) | Q20<br>(%) | Q30<br>(%) |
|------------|-----------|-------------------|----------------|---------------------|-------------------|------------|------------|
| Pg_anther2 | 42350106  | 6394866006        | 42102446       | 6337271438          | 0.00208           | 97.07      | 92.62      |
| Pg_anther4 | 41708934  | 6298049034        | 41225410       | 6212382316          | 0.008355          | 95.08      | 88.76      |
| Pg_anther9 | 45340278  | 6846381978        | 44964900       | 6773780416          | 0.008987          | 95.62      | 89.75      |
| Pg_petal2  | 44916484  | 6782389084        | 44659014       | 6722178230          | 0.002313          | 97.04      | 92.72      |
| Pg_petal4  | 46465480  | 7016287480        | 45870616       | 6910089572          | 0.00677           | 95.22      | 89         |
| Pg_petal9  | 42646274  | 6439587374        | 42198864       | 6355860646          | 0.007268          | 95.61      | 89.71      |

**Table S4.** RNAseq mapped reads and distributions.

| Sample     | Total mapped         | Multiple mapped    | Uniquely mapped      | Gene                 | Exon                 | Intergenic          |
|------------|----------------------|--------------------|----------------------|----------------------|----------------------|---------------------|
| Pg_anther2 | 39009104<br>(92.65%) | 1931146<br>(4.95%) | 37077958<br>(95.05%) | 32475642<br>(87.59%) | 31859470<br>(98.10%) | 4602316<br>(12.41%) |
| Pg_anther4 | 36046221<br>(87.44%) | 2695755<br>(7.48%) | 33350466<br>(92.52%) | 28592716<br>(85.73%) | 28135489<br>(98.40%) | 4757750<br>(14.27%) |
| Pg_anther9 | 39758843<br>(88.42%) | 2133951<br>(5.37%) | 37624892<br>(94.63%) | 32581483<br>(86.60%) | 31490897<br>(96.65%) | 5043409<br>(13.40%) |
| Pg_petal2  | 41098186<br>(92.03%) | 3642607<br>(8.86%) | 37455579<br>(91.14%) | 31020157<br>(82.82%) | 30016225<br>(96.76%) | 6435422<br>(17.18%) |
| Pg_petal4  | 40602543<br>(88.52%) | 2110683<br>(5.20%) | 38491860<br>(94.80%) | 33369330<br>(86.69%) | 32170512<br>(96.41%) | 5122530<br>(13.31%) |
| Pg_petal9  | 37710951<br>(89.36%) | 2682376<br>(7.11%) | 35028575<br>(92.89%) | 29780137<br>(85.02%) | 28765272<br>(96.59%) | 5248438<br>(14.98%) |
