# Supplementary figures and images for: Identification and Characterization of Two Regiospecific Tricetin UDP-Dependent Glycosyltransferases from Pomegranate (Punica granatum L.)
Source: MDPI journal article supplement (doi:10.3390/plants11060810), 2022-03-18

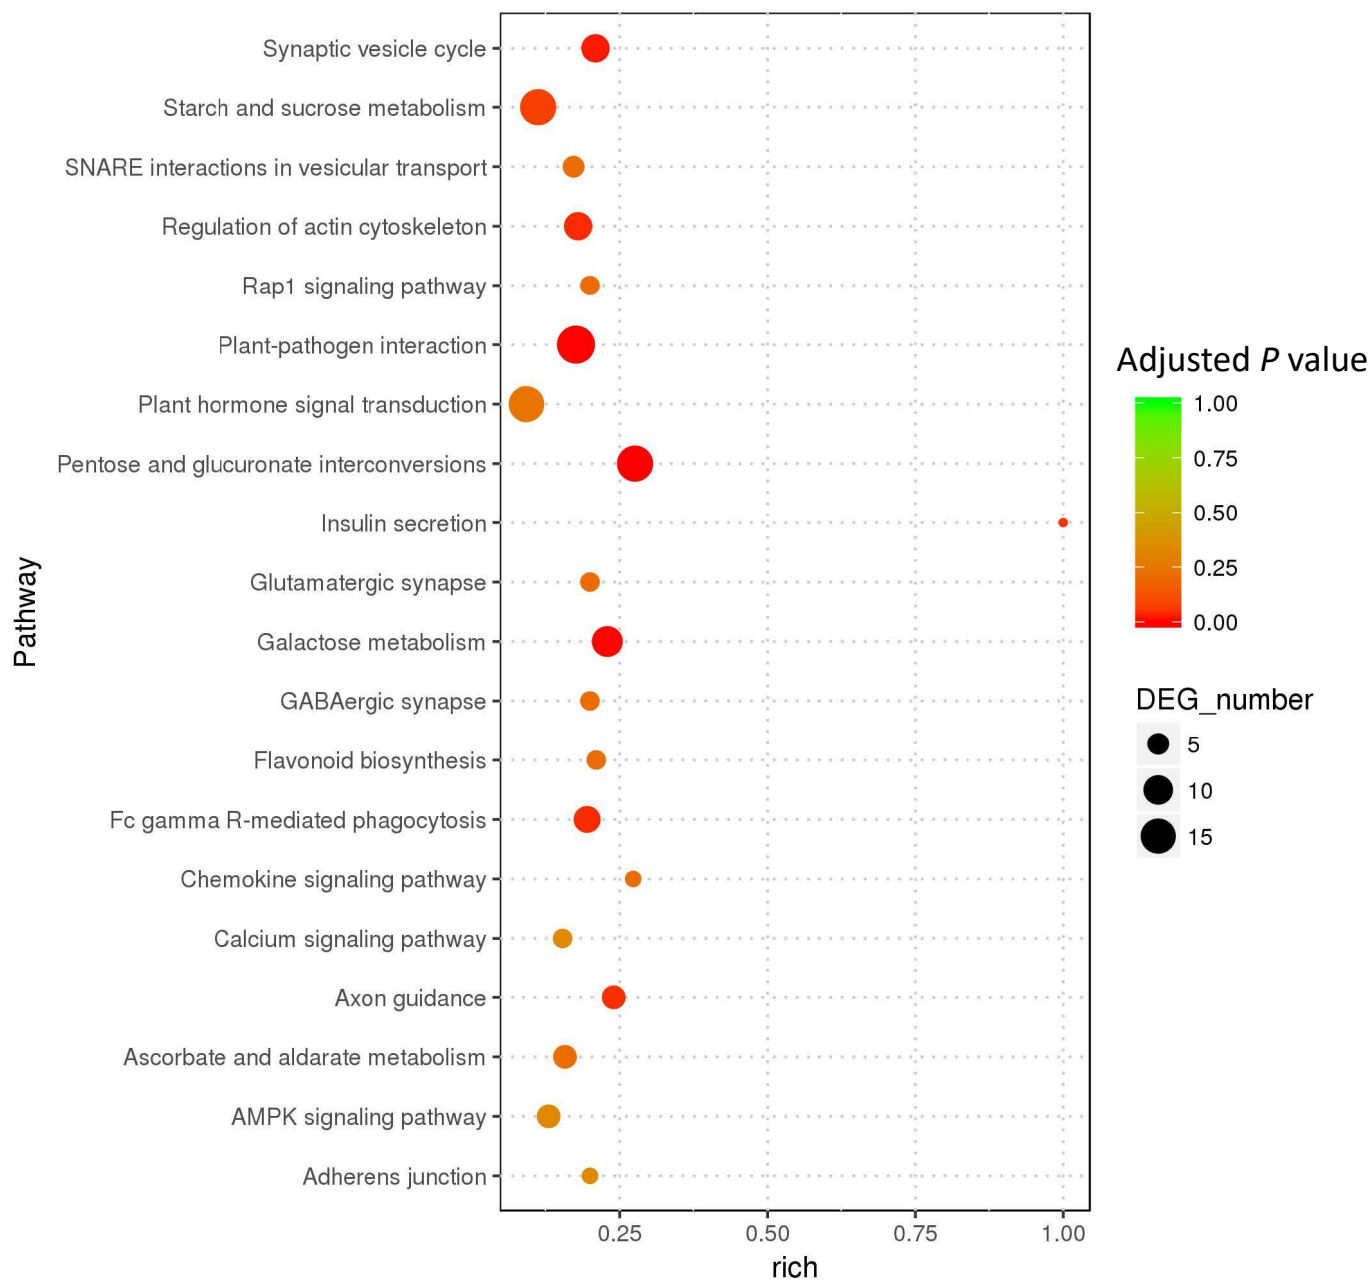

Supplement: s1 [file s1]
